# Supplementary material
Source: Springer Nature journal article supplement (https://www.springermedizin.de/resource/supplementary/12947_2006_144_MOESM1_ESM.pdf/9556320)

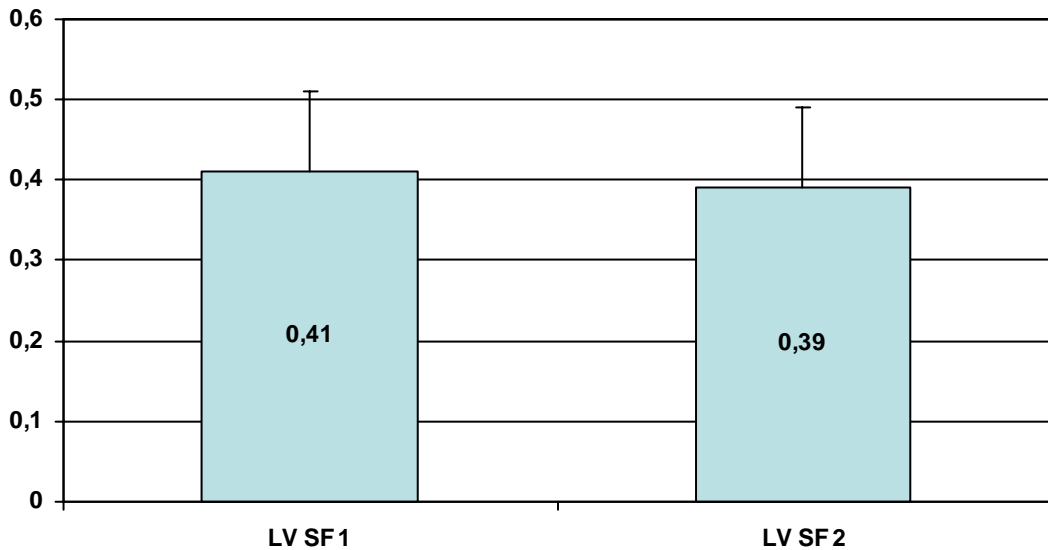

Supplement: MOESM1 [file 9556320]
